# Supplementary material
Source: publisher figshare collection journal article supplement (https://acs.figshare.com/ndownloader/files/21844023)
Supplement: Supplementary file 1 [file 21844023]

# N-Doping Holey Graphene TiO<sub>2</sub>-Pt Composite as Efficient Electrocatalyst for Methanol Oxidation

*Rongli Cui,<sup>a, ‡</sup> Shuaichao Liu,<sup>b, ‡</sup> Xihong Guo,<sup>a</sup> Huan Huang,<sup>a</sup> Jiahao Wang,<sup>a</sup> Bing Liu,<sup>a</sup> Ying Li,<sup>a</sup> Dangui Zhao,<sup>a</sup> Jinquan Dong,<sup>a</sup> and Baoyun Sun<sup>\*, a</sup>*

<sup>a</sup> *CAS Key Laboratory for Biomedical Effects of Nanomaterial & Nanosafety, Institute of High Energy Physics, Chinese Academy of Science (CAS), Beijing 100049, China*

<sup>b</sup> *College of Chemistry and Chemical Engineering, Inner Mongolia University, Huhhot, 010021, China*

<sup>‡</sup> These authors contributed equally to this work.

Address correspondence to Baoyun Sun, [sunby@ihep.ac.cn](mailto:sunby@ihep.ac.cn)

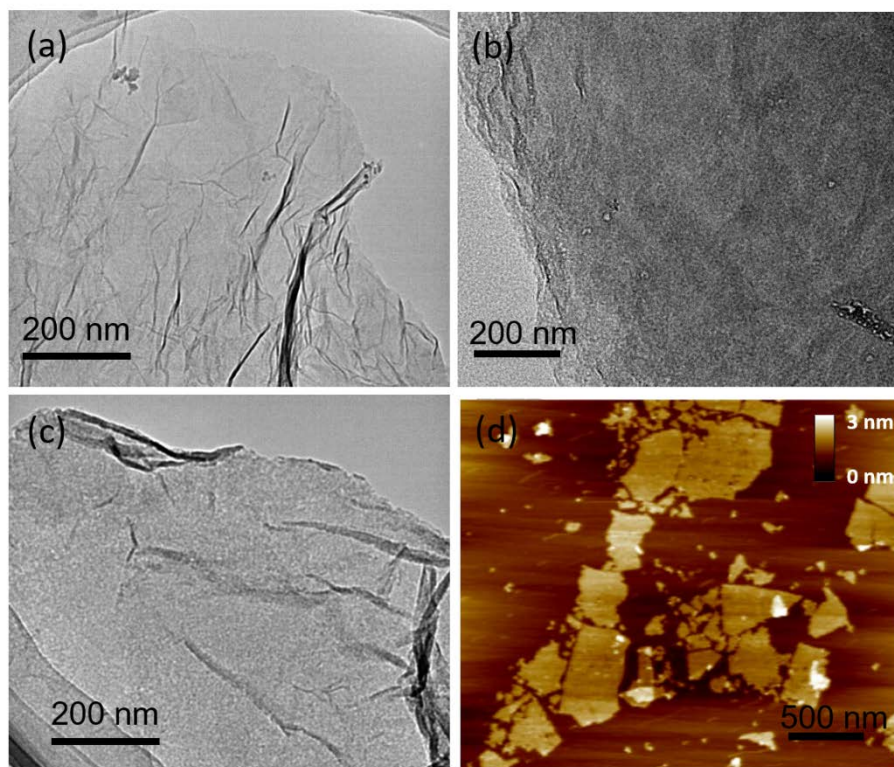

**Figure S1.** TEM images of GO (a), NHGO (b), HGO (c), and AFM image of HGO (d)

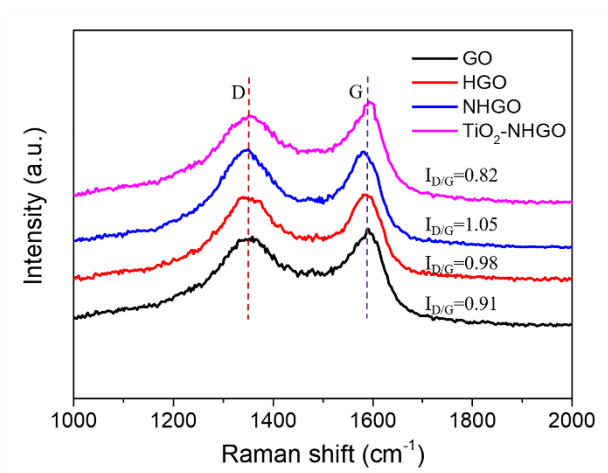

**Figure S2.** Raman spectra of GO, HGO, NHGO, and TiO<sub>2</sub>-NHGO

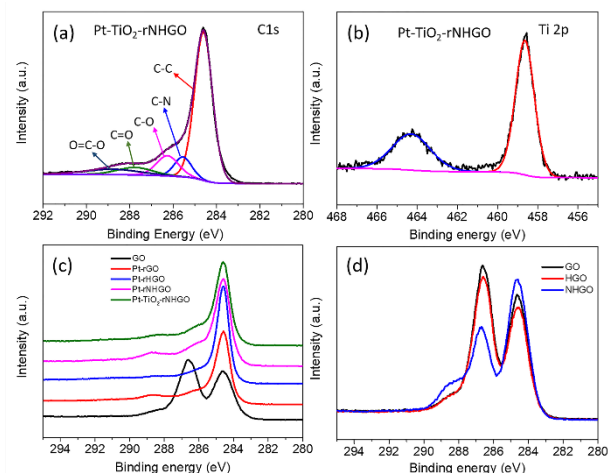

**Figure S3.** XPS spectra of C1s (a), Ti 2p (b) of Pt-TiO<sub>2</sub>-rNHGO, C1s comparison of GO, Pt-rGO, Pt-rHGO, Pt-rNHGO and Pt-TiO<sub>2</sub>-rNHGO (c), and GO, HGO and NHGO (d).

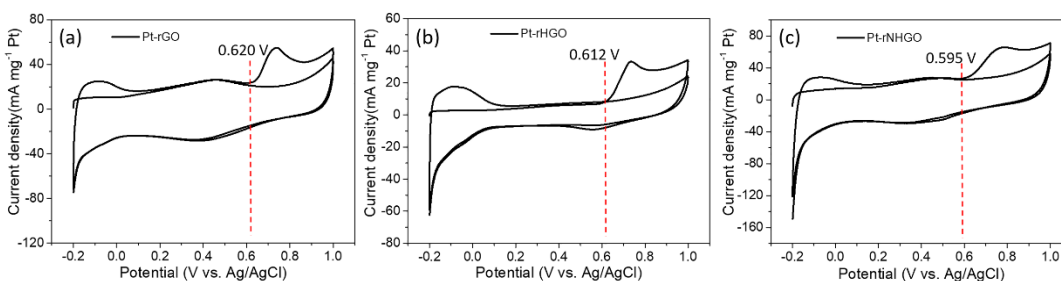

**Figure S4.** CO-stripping CVs of Pt-rGO (a), Pt-rHGO (b), and Pt-rNHGO (c) catalysts in a solution of 0.5 M H<sub>2</sub>SO<sub>4</sub> at a scan rate of 50 mVs<sup>-1</sup>.
